# Supplementary material for: Epichloë Endophytes Shape the Foliar Endophytic Fungal Microbiome and Alter the Auxin and Salicylic Acid Phytohormone Levels in Two Meadow Fescue Cultivars
Source: MDPI journal article supplement (doi:10.3390/jof9010090), 2023-01-06
Supplement: s1 [file s1]

## Supplementary Material

**Table S1:** SIMPER (Similarity Percentages) analysis in meadow fescue (*Festuca pratensis*) leaves of E+ and E- plants in total and *Epichloë*-depleted fungal communities (VE- 'Valtteri' plants without *Epichloë*, VE+ - 'Valtteri' with *Epichloë*, KE- 'Kasper' without *Epichloë* and KE+ 'Kasper' with *Epichloë*) showing microbial taxa with difference in average relative abundances. OTUs – Operational Taxonomic Units, Av.Abund – Average abundance, Av.Diss. – Average dissimilarity, Diss/SD – Dissimilarity/ Standard Deviation, Contrib% - Contribution percentage, Cum% - Cumulative percentage

### Total communities

#### Groups VE- & VE+

Average dissimilarity = 77.97

|      | Group VE- | Group VE+ |         |         |          |       |                                |
|------|-----------|-----------|---------|---------|----------|-------|--------------------------------|
| OTUs | Av.Abund  | Av.Abund  | Av.Diss | Diss/SD | Contrib% | Cum.% | Taxa                           |
| otu2 | 0.02      | 59.43     | 29.7    | 4.12    | 38.1     | 38.1  | <i>Epichloë</i>                |
| otu1 | 28.53     | 8.75      | 11.24   | 1.4     | 14.42    | 52.52 | <i>Mycosphaerella_tassiana</i> |

#### Groups KE- & KE+

Average dissimilarity = 81.97

|      | Group KE- | Group KE+ |         |         |          |       |                                |
|------|-----------|-----------|---------|---------|----------|-------|--------------------------------|
| OTUs | Av.Abund  | Av.Abund  | Av.Diss | Diss/SD | Contrib% | Cum.% |                                |
| otu2 | 0.03      | 36.83     | 18.4    | 2.88    | 22.45    | 22.45 | <i>Epichloë</i>                |
| otu1 | 30.87     | 7.06      | 11.94   | 2.24    | 14.57    | 37.02 | <i>Mycosphaerella_tassiana</i> |
| otu3 | 0.03      | 18.91     | 9.45    | 1.8     | 11.52    | 48.55 | <i>Cadophora</i>               |
| otu4 | 0.01      | 7.82      | 3.91    | 1.89    | 4.77     | 53.31 | Heliales_unidentified          |

### *Epichloë*-depleted communities

#### Groups VE- & VE+

Average dissimilarity = 55.99

|       | Group VE- | Group VE+ |         |         |          |       |                                      |
|-------|-----------|-----------|---------|---------|----------|-------|--------------------------------------|
| OTUs  | Av.Abund  | Av.Abund  | Av.Diss | Diss/SD | Contrib% | Cum.% | Taxa                                 |
| otu1  | 28.60     | 19.39     | 10.02   | 1.38    | 18.49    | 18.49 | <i>Mycosphaerella_tassiana</i>       |
| otu3  | 12.11     | 7.81      | 7.16    | 1.14    | 13.22    | 31.71 | <i>Cadophora</i>                     |
| otu4  | 5.27      | 3.08      | 3.09    | 1.12    | 5.70     | 37.42 | Heliales_sps.                        |
| otu5  | 5.93      | 7.75      | 2.89    | 1.33    | 5.34     | 42.75 | Pleosporales_sps.                    |
| otu12 | 4.25      | 0.72      | 1.97    | 0.66    | 3.65     | 46.40 | <i>Phaeosphaeria_triglochynicola</i> |
| otu11 | 4.70      | 2.01      | 1.96    | 0.97    | 3.61     | 50.01 | Capnodiales_sps.                     |

#### Groups KE- & KE+

Average dissimilarity = 72.32

|      | Group KE- | Group KE+ |         |         |          |       |                                |
|------|-----------|-----------|---------|---------|----------|-------|--------------------------------|
| OTUs | Av.Abund  | Av.Abund  | Av.Diss | Diss/SD | Contrib% | Cum.% |                                |
| otu3 | 0.03      | 29.32     | 14.65   | 1.73    | 20.26    | 20.26 | <i>Cadophora</i>               |
| otu1 | 31.6      | 11.49     | 10.33   | 1.96    | 14.28    | 34.54 | <i>Mycosphaerella_tassiana</i> |
| otu4 | 0.01      | 12.1      | 6.04    | 1.84    | 8.36     | 42.9  | Heliales_sps.                  |
| otu5 | 6.48      | 4.06      | 3.21    | 1.55    | 4.44     | 47.34 | Pleosporales_sps.              |
| otu6 | 7.36      | 1.83      | 2.81    | 1.05    | 3.89     | 51.23 | <i>Vishniacozyma_victoriae</i> |

Table S2: PERMANOVA results for bacterial communities in meadow fescue (*Festuca pratensis*). df: degrees of freedom, SS: Sum of squares, MS: Mean sum of squares, Pseudo-F: F-value by permutation, P(perm): p-values based on more than 900 permutations.

| Source             | df | SS     | MS     | Pseudo-F | P(perm) | Unique perms |
|--------------------|----|--------|--------|----------|---------|--------------|
| Tissue             | 1  | 28791  | 28791  | 16.32    | 0.001   | 998          |
| Endophyte          | 3  | 4460.3 | 1486.8 | 0.843    | 0.889   | 994          |
| Tissue x Endophyte | 3  | 4801.1 | 1600.4 | 0.907    | 0.75    | 999          |
